# Supplementary material for: The Association of Mean Plasma Glucose and In hospital Death Proportion: A Retrospective, Cohort Study of 162,169 In-Patient Data
Source: Hindawi journal article supplement (doi:10.1155/2021/1513683), 2021-01-12
Supplement: f1 [file 1513683.f1.pdf]

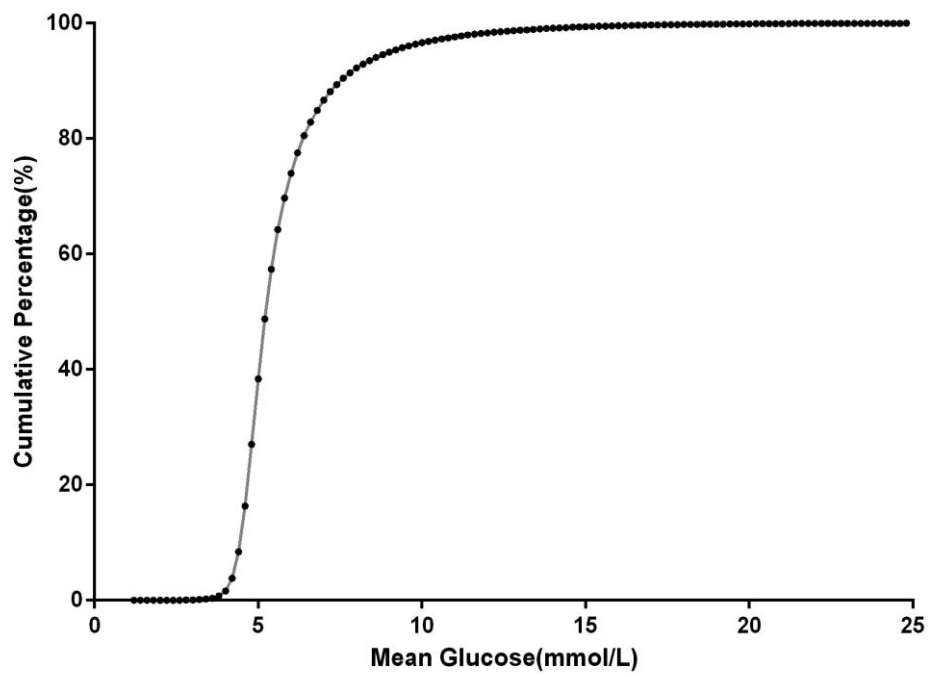

Supplementary Figure 1 Cumulative frequency curve of in-hospital mean glucose
